# Supplementary material
Source: Copernicus journal article supplement (doi:10.5194/egusphere-2026-1692)
Supplement: Supplementary file 1 [file egusphere-2026-1692-supplement.pdf]

# Supplementary Material: From direct emission factors to inverse and indirect impact factors of road traffic: Influence of emerging and unregulated pollutants

Lauri Savolainen<sup>1</sup>, Teemu Lepistö<sup>1</sup>, Heidi Hellén<sup>2</sup>, Henna Lintusaari<sup>1</sup>, Milja Jäppi<sup>1</sup>, Jarkko V. Niemi<sup>3</sup>, Kimmo Teinilä<sup>2</sup>, Minna Aurela<sup>2</sup>, Markus Lampimäki<sup>4</sup>, Anu Kousa<sup>3</sup>, Janne Lampilahti<sup>4</sup>, Katrianne Lehtipalo<sup>2, 4</sup>, Tuukka Petäjä<sup>4</sup>, Miikka Dal Maso<sup>1</sup>, Hanna E. Manninen<sup>3</sup>, Hilikka Timonen<sup>2</sup>, Topi Rönkkö<sup>1</sup>

<sup>1</sup>Aerosol Physics Laboratory, Physics Unit, Tampere University, 33014 Tampere, Finland

<sup>2</sup>Atmospheric Composition Research, Finnish Meteorological Institute, 00101 Helsinki, Finland

<sup>3</sup>Helsinki Region Environmental Services Authority (HSY), 00240 Helsinki, Finland

<sup>4</sup>Institute for Atmospheric and Earth System Research/Physics, Faculty of Science, University of Helsinki, Helsinki, Finland

## Shares of mileages of different vehicle types and emissions classes in Finland in 2022

**Table S1: Relative shares of different vehicle types for mileages, NO<sub>x</sub> and PM<sub>2.5</sub> exhaust emissions at the studied street canyon. The values are based on the VTT's Lipasto Aliisa model 2021 results (see Table S2) and the emission factor database of the Handbook of Emission Factors for Road Transport (HBEFA version 4.1).**

| Vehicle type          | Mileage | NO <sub>x</sub> | PM <sub>2.5</sub> |
|-----------------------|---------|-----------------|-------------------|
| Car gasoline          | 45 %    | 5 %             | 6 %               |
| Car diesel            | 34 %    | 52 %            | 38 %              |
| Van                   | 12 %    | 19 %            | 36 %              |
| City bus diesel       | 6 %     | 11 %            | 10 %              |
| Truck without trailer | 3 %     | 9 %             | 8 %               |
| Truck with trailer    | 1 %     | 4 %             | 2 %               |
| Sum                   | 100 %   | 100 %           | 100 %             |

**Table S2: Shares of mileages for different vehicle types and EURO emission classes in Finland in 2022. The values are interpolated from VTT's Lipasto Aliisa model 2021 results.**

| Vehicle type | EURO0 | EURO1 | EURO2 | EURO3 | EURO4 | EURO5 | EEV** | EURO6 | PHEV*** | Electric | Sum   |
|--------------|-------|-------|-------|-------|-------|-------|-------|-------|---------|----------|-------|
| Car gasoline | 0 %   | 1 %   | 4 %   | 14 %  | 14 %  | 19 %  | 0 %   | 42 %  | 5 %     | 0 %      | 100 % |
| Car diesel   | 0 %   | 0 %   | 1 %   | 6 %   | 18 %  | 33 %  | 0 %   | 41 %  | 0 %     | 0 %      | 100 % |
| Van          | 1 %   | 1 %   | 4 %   | 10 %  | 23 %  | 18 %  | 0 %   | 43 %  | 0 %     | 0 %      | 100 % |
| City bus*    | 0 %   | 0 %   | 0 %   | 0 %   | 0 %   | 0 %   | 15 %  | 66 %  | 0 %     | 18 %     | 100 % |
| Truck        | 0 %   | 0 %   | 2 %   | 9 %   | 12 %  | 26 %  | 0 %   | 51 %  | 0 %     | 0 %      | 100 % |

\*The values for buses are from the Helsinki Region Transport HSL for the Helsinki metropolitan area.

\*\*Environmentally enhanced vehicle, i.e. emission class between Euro 5 and Euro 6.

\*\*\*Plug-in hybrid electric vehicle

## Instrumentation and utilized time resolutions in the EF calculation

Table S3: Utilized time resolutions in the EF calculation.

| <b>Instrument</b>   | <b>Parameter(s)</b>                            | <b>Resolution in EF calculation</b> |
|---------------------|------------------------------------------------|-------------------------------------|
| <b>Airmodus A20</b> | PN > 5.4 nm                                    | 1 min                               |
| <b>AE33</b>         | BC                                             | 1 min                               |
| <b>Fidas 200</b>    | PM <sub>2.5</sub> , PM <sub>10</sub>           | 1 min                               |
| <b>AQ Urban</b>     | LDSA                                           | 1 min                               |
| <b>APNA 370</b>     | NO, NO <sub>2</sub> , NO <sub>x</sub>          | 1 min                               |
| <b>APMA 360</b>     | CO                                             | 1 min                               |
| <b>APOA 370</b>     | O <sub>3</sub>                                 | 1 min                               |
| <b>SP-AMS</b>       | Organics, Nitrate, Sulfate, Ammonium, Chloride | 10 min                              |
| <b>TD-GC-MS</b>     | VOCs                                           | 30–45 min                           |
| <b>DMPS</b>         | Particle number size distribution              | 60 min                              |
| <b>NAIS</b>         | Particle number size distribution, ions        | 60 min                              |

## Emission factors of regulated and non-regulated emerging pollutants

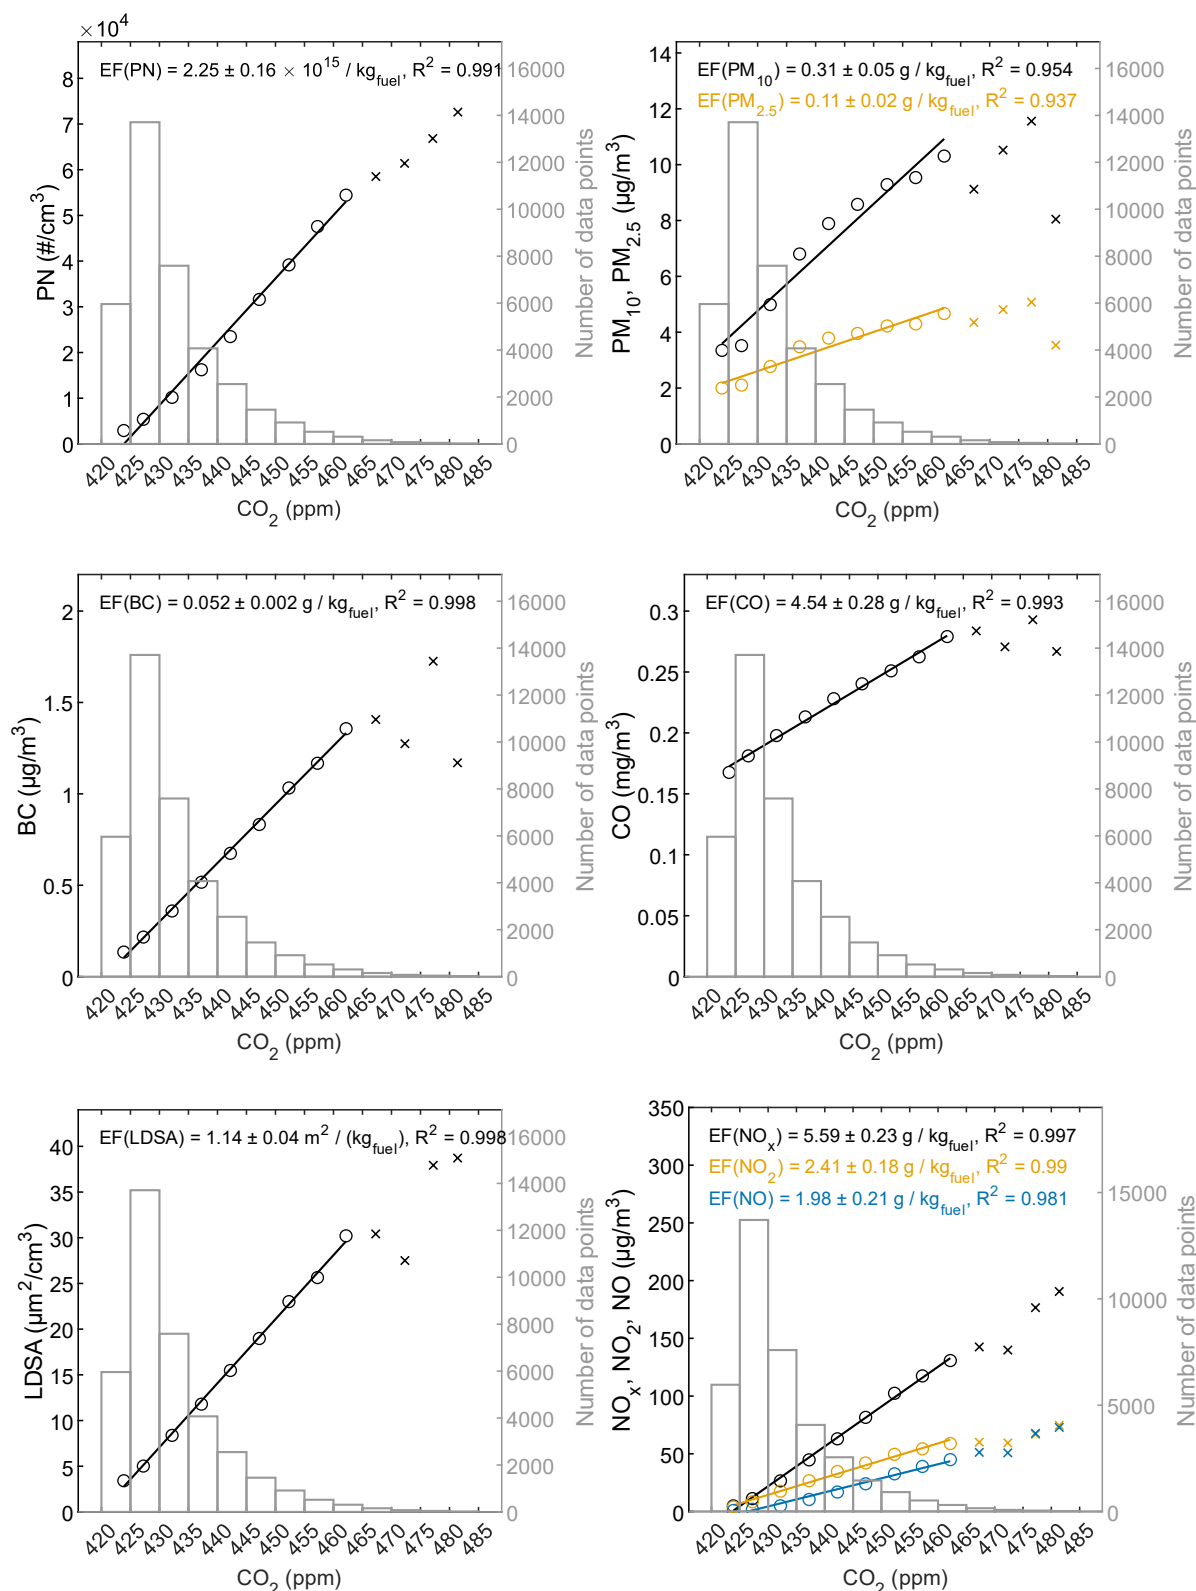

**Figure S1: Concentrations of PN (> 5.4 nm), PM<sub>10</sub>, PM<sub>2.5</sub>, BC, CO, LDSA, NO<sub>x</sub>, NO and NO<sub>2</sub> as a function of CO<sub>2</sub> concentration and the determined EFs, including 95 % confidence intervals and R<sup>2</sup> of the averaged linear fits. Also, the number of data points in each CO<sub>2</sub> concentration bin is shown. The pollution episodes were not included in the data.**

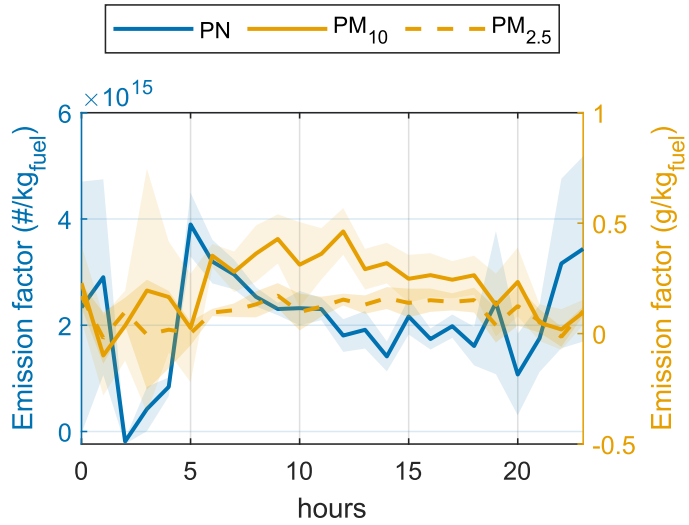

**Figure S2: Diurnal PN, PM<sub>10</sub>, and PM<sub>2.5</sub> EFs with 95 % confidence intervals (shaded areas). Weekends and the pollution episodes were not included in the data.**

**Table S4: Average emission factors for different vehicle types at the studied street canyon in 2022. The values are based on the VTT's Lipasto Aliisa model 2021 results (see Table S2) and the emission factor database of the Handbook of Emission Factors for Road Transport (HBEFA version 4.1).**

| Vehicle type          | NO <sub>x</sub> EF (g/km) | PM <sub>2.5</sub> EF (g/km) |
|-----------------------|---------------------------|-----------------------------|
| Car gasoline          | 0.0648                    | 0.0015                      |
| Car diesel            | 0.8291                    | 0.0139                      |
| Van                   | 0.8749                    | 0.0374                      |
| City bus diesel       | 1.0362                    | 0.0211                      |
| Truck without trailer | 1.7632                    | 0.0330                      |
| Truck with trailer    | 3.6786                    | 0.0555                      |
| Mean                  | 0.5447                    | 0.0123                      |

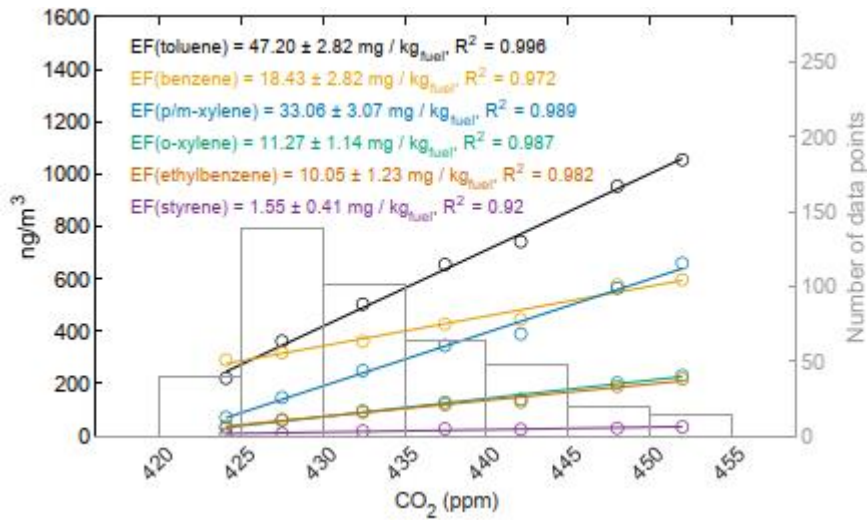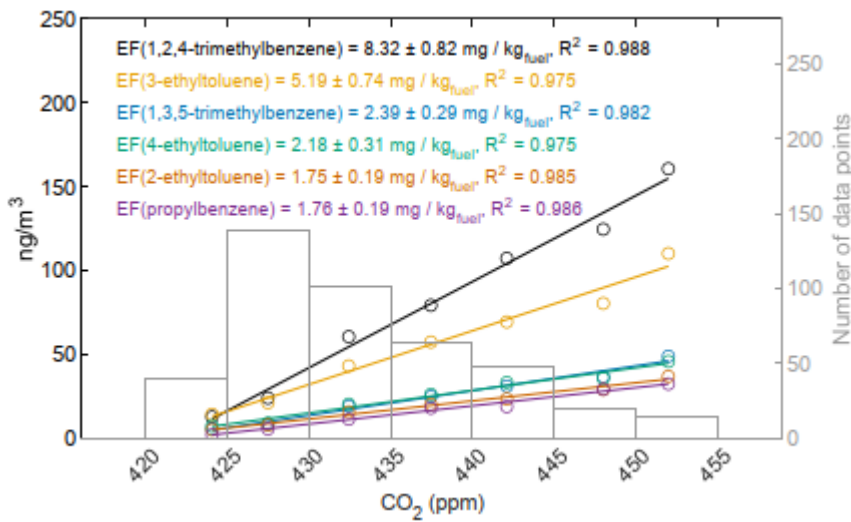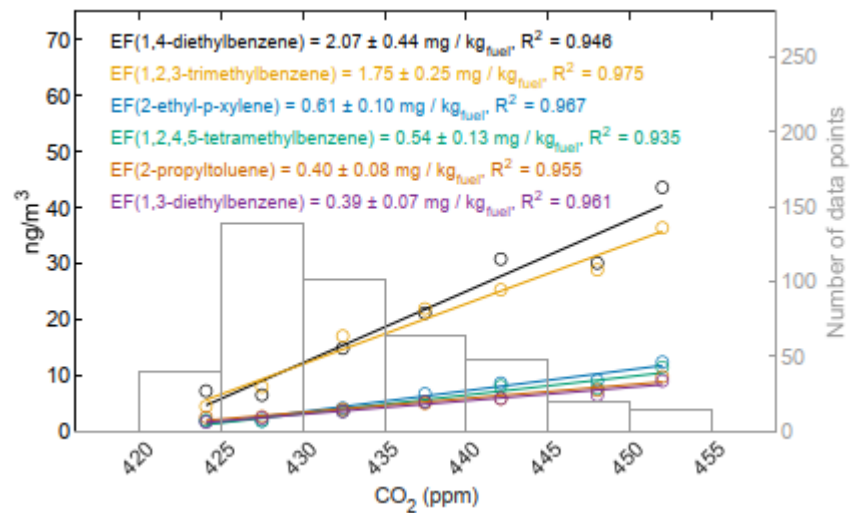

Figure S3: Concentrations of the studied aromatic hydrocarbon VOCs as a function of CO<sub>2</sub> concentration and the determined EFs, including 95 % confidence intervals and R<sup>2</sup> of the averaged linear fits. Also, the number of data points in each CO<sub>2</sub> concentration bin is shown. The pollution episodes were not included in the data. Note the varying y-axes.

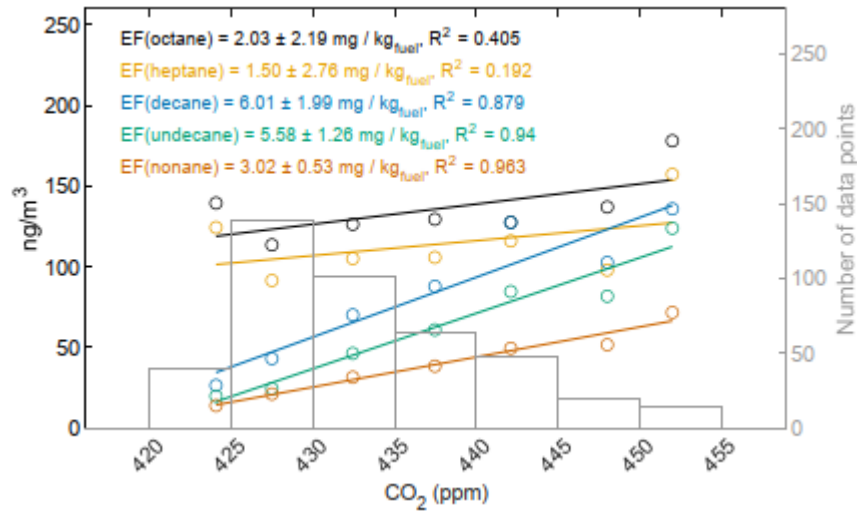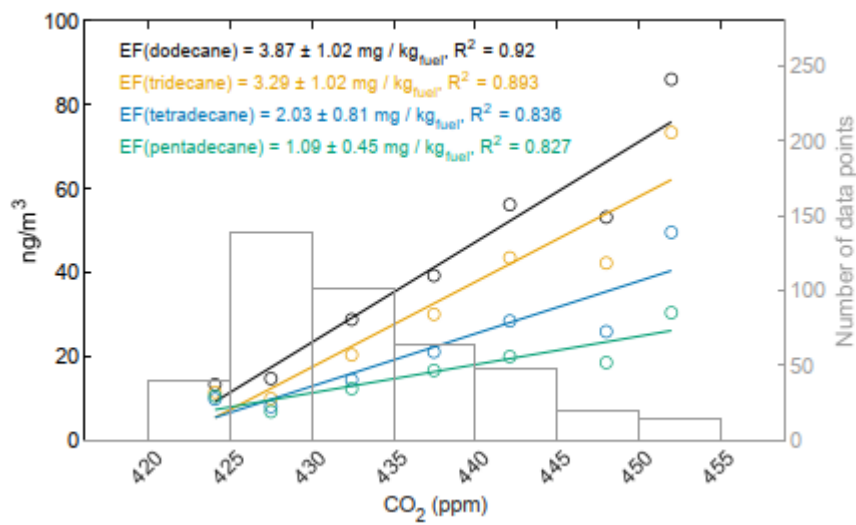

Figure S4: Concentrations of the studied alkane VOCs as a function of CO<sub>2</sub> concentration and the determined EFs, including 95 % confidence intervals and R<sup>2</sup> of the averaged linear fits. Also, the number of data points in each CO<sub>2</sub> concentration bin is shown. The pollution episodes were not included in the data. Note the varying y-axes.

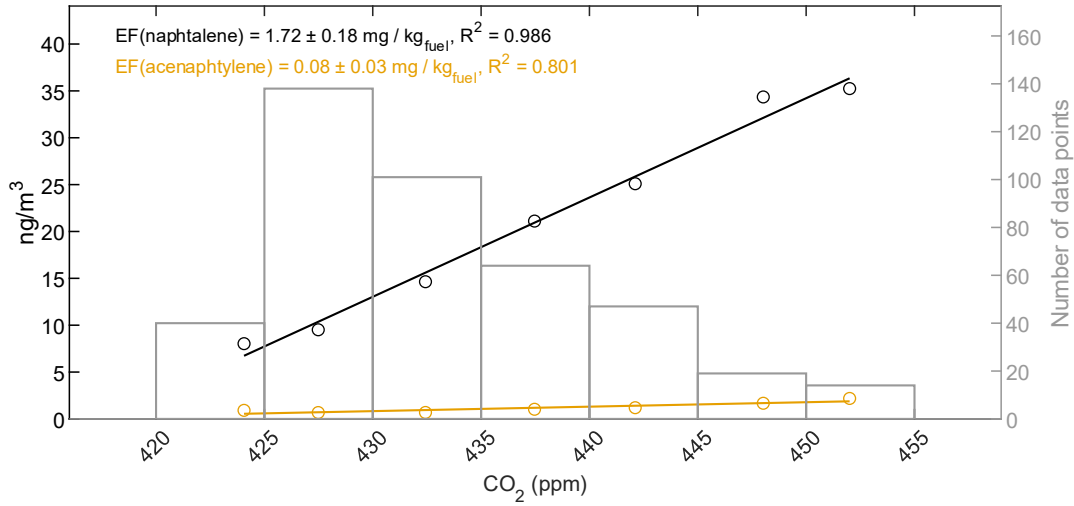

**Figure S5: Concentrations of the studied gaseous PAHs as a function of CO<sub>2</sub> concentration and the determined EFs, including 95 % confidence intervals and R<sup>2</sup> of the averaged linear fits. The pollution episodes were not included in the data. Also, the number of data points in each CO<sub>2</sub> concentration bin is shown.**

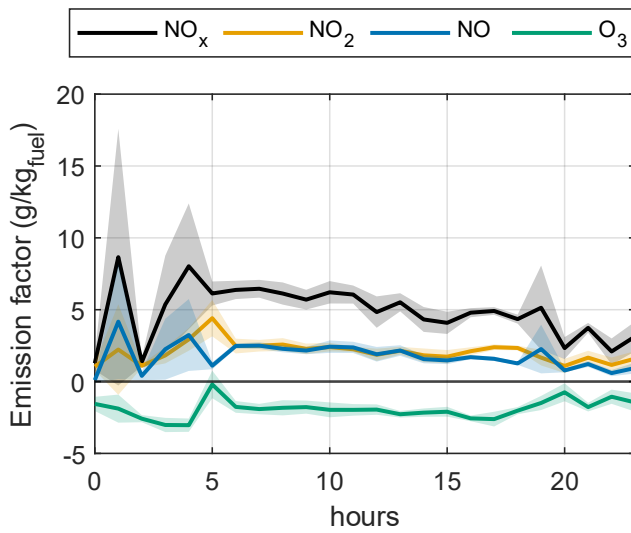

**Figure S6: Diurnal NO<sub>x</sub>, NO<sub>2</sub>, NO, and O<sub>3</sub> EFs with 95 % confidence intervals (shaded areas). Weekends and the pollution episodes were not included in the data.**

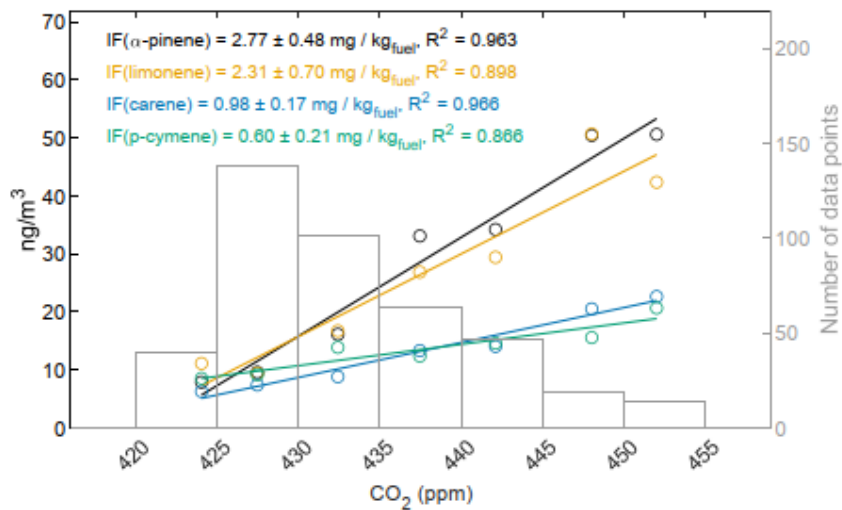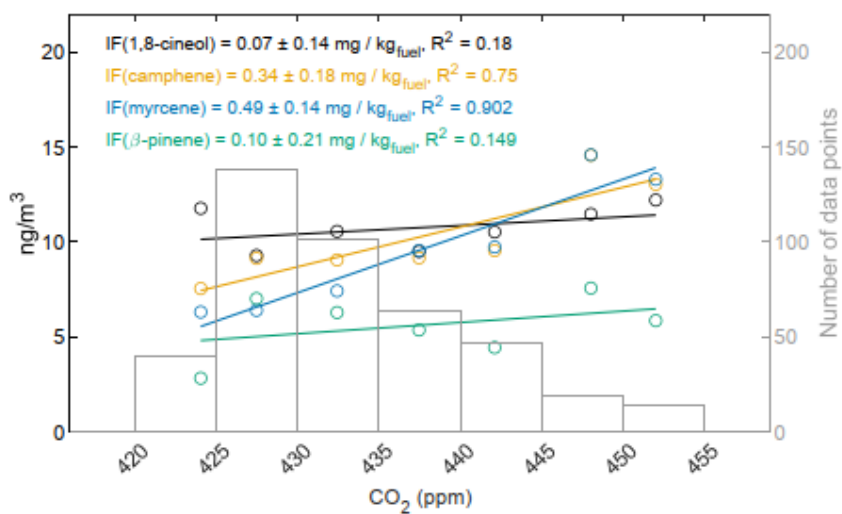

**Figure S7: Concentrations of the studied terpenoid VOCs as a function of CO<sub>2</sub> concentration and the determined EFs, including 95 % confidence intervals and R<sup>2</sup> of the averaged linear fits. The pollution episodes were not included in the data. Also, the number of data points in each CO<sub>2</sub> concentration bin is shown.**

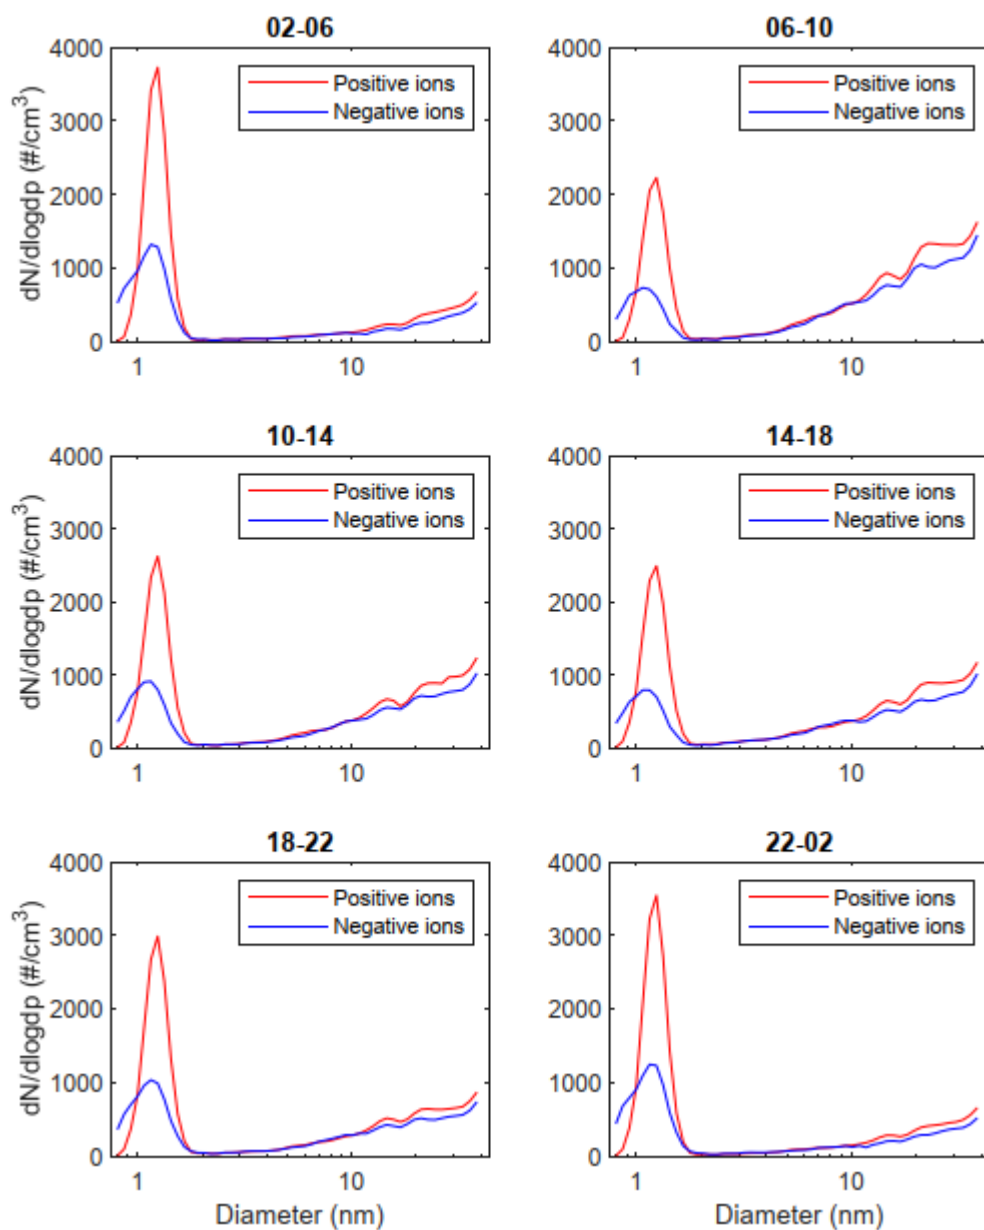

Figure S8. Size distributions of positive and negative ions during different times of the day. The pollution episodes and weekends were not included in the data.

**Table S5: Comparison of VOC EFs and IFs together with 95 % confidence intervals (CI) and the R<sup>2</sup> of the averaged linear fits during episodic and non-episodic periods.**

| Class                                   | VOC                    | Episodic                                             |                                                 | Non-episodic                                         |                                                 |
|-----------------------------------------|------------------------|------------------------------------------------------|-------------------------------------------------|------------------------------------------------------|-------------------------------------------------|
|                                         |                        | EF (IF) and<br>95 % CI<br>(mg / kg <sub>fuel</sub> ) | R <sup>2</sup> of the<br>averaged<br>linear fit | EF (IF) and<br>95 % CI<br>(mg / kg <sub>fuel</sub> ) | R <sup>2</sup> of the<br>averaged<br>linear fit |
| <b>Aromatic hydrocarbons</b>            | Benzene                | 43.6 ± 16.4                                          | 0.876                                           | 18.4 ± 2.8                                           | 0.972                                           |
|                                         | Toluene                | 36.9 ± 18.2                                          | 0.805                                           | 47.2 ± 2.8                                           | 0.996                                           |
|                                         | Ethylbenzene           | 7.9 ± 4.7                                            | 0.743                                           | 10.1 ± 1.2                                           | 0.982                                           |
|                                         | p/m-xylene             | 21.1 ± 11.2                                          | 0.765                                           | 33.1 ± 3.1                                           | 0.989                                           |
|                                         | Styrene                | 4.4 ± 3.7                                            | 0.590                                           | 1.6 ± 0.4                                            | 0.920                                           |
|                                         | o-xylene               | 9.1 ± 5.1                                            | 0.759                                           | 11.3 ± 1.1                                           | 0.987                                           |
|                                         | Propyl benzene         | 1.5 ± 0.9                                            | 0.719                                           | 1.8 ± 0.2                                            | 0.986                                           |
|                                         | 3-ethyltoluene         | 3.3 ± 3.0                                            | 0.537                                           | 5.2 ± 0.7                                            | 0.975                                           |
|                                         | 4-ethyltoluene         | 3.1 ± 2.6                                            | 0.582                                           | 2.2 ± 0.3                                            | 0.975                                           |
|                                         | 1,3,5-trimethylbenzene | 4.1 ± 3.8                                            | 0.543                                           | 2.4 ± 0.3                                            | 0.982                                           |
|                                         | 2-ethyltoluene         | 3.0 ± 2.7                                            | 0.551                                           | 1.8 ± 0.2                                            | 0.985                                           |
|                                         | 1,2,4-trimethylbenzene | 4.6 ± 3.4                                            | 0.645                                           | 8.3 ± 0.8                                            | 0.988                                           |
|                                         | 1,2,3-trimethylbenzene | 1.1 ± 0.9                                            | 0.575                                           | 1.8 ± 0.3                                            | 0.975                                           |
|                                         | 1,3-diethylbenzene     | -0.1 ± 0.1                                           | 0.255                                           | 0.4 ± 0.1                                            | 0.761                                           |
|                                         | 1,4-diethylbenzene     | 0.7 ± 0.4                                            | 0.752                                           | 2.1 ± 0.4                                            | 0.946                                           |
|                                         | 2-propyltoluene        | 0.1 ± 0.1                                            | 0.611                                           | 0.4 ± 0.1                                            | 0.955                                           |
| 2-ethyl-p-xylene                        | 0.2 ± 0.1              | 0.805                                                | 0.6 ± 0.1                                       | 0.967                                                |                                                 |
| 1,2,4,5-tetramethylbenzene              | 0.1 ± 0.2              | 0.280                                                | 0.5 ± 0.1                                       | 0.935                                                |                                                 |
| <b>Alkanes</b>                          | Heptane                | 5.0 ± 4.3                                            | 0.582                                           | 1.5 ± 2.8                                            | 0.192                                           |
|                                         | Octane                 | 3.3 ± 4.3                                            | 0.378                                           | 2.0 ± 2.2                                            | 0.405                                           |
|                                         | Nonane                 | 1.5 ± 0.9                                            | 0.734                                           | 3.0 ± 0.5                                            | 0.963                                           |
|                                         | Decane                 | 2.0 ± 1.3                                            | 0.697                                           | 6.0 ± 2.0                                            | 0.879                                           |
|                                         | Undecane               | 3.5 ± 0.8                                            | 0.951                                           | 5.6 ± 1.3                                            | 0.940                                           |
|                                         | Dodecane               | 1.8 ± 0.7                                            | 0.865                                           | 3.9 ± 1.0                                            | 0.920                                           |
|                                         | Tridecane              | 1.5 ± 1.0                                            | 0.705                                           | 3.3 ± 1.0                                            | 0.893                                           |
|                                         | Tetradecane            | 1.0 ± 0.4                                            | 0.868                                           | 2.0 ± 0.8                                            | 0.836                                           |
|                                         | Pentadecane            | 1.2 ± 0.5                                            | 0.826                                           | 1.1 ± 0.5                                            | 0.827                                           |
| <b>Polycyclic aromatic hydrocarbons</b> | Naphtalene             | 1.3 ± 0.9                                            | 0.651                                           | 1.7 ± 0.2                                            | 0.986                                           |
|                                         | Acenaphthylene         | 0.06 ± 0.05                                          | 0.596                                           | 0.08 ± 0.03                                          | 0.801                                           |
| <b>Terpenoids</b>                       | a-pinene               | 7.6 ± 5.8                                            | 0.635                                           | 2.8 ± 0.5                                            | 0.963                                           |
|                                         | Camphene               | 1.2 ± 1.1                                            | 0.532                                           | 0.3 ± 0.2                                            | 0.750                                           |
|                                         | Myrcene                | 1.7 ± 1.5                                            | 0.547                                           | 0.5 ± 0.1                                            | 0.902                                           |
|                                         | b-pinene               | 1.6 ± 2.5                                            | 0.285                                           | 0.1 ± 0.2                                            | 0.149                                           |
|                                         | Carene                 | 2.1 ± 2.1                                            | 0.496                                           | 1.0 ± 0.2                                            | 0.966                                           |
|                                         | p-cymene               | 0.4 ± 0.8                                            | 0.230                                           | 0.6 ± 0.2                                            | 0.866                                           |
|                                         | Limonene               | 3.4 ± 2.2                                            | 0.706                                           | 2.3 ± 0.7                                            | 0.898                                           |
|                                         | 1,8-cineol             | 0.8 ± 1.0                                            | 0.401                                           | 0.1 ± 0.1                                            | 0.180                                           |

Table S6: Episodic and non-episodic EFs of of PN (> 5.4 nm), PM<sub>10</sub>, PM<sub>2.5</sub>, BC, CO, LDSA, NO<sub>x</sub>, NO and NO<sub>2</sub>, together with confidence intervals (CI), and R<sup>2</sup> values of the averaged linear fits. Also, the IF of O<sub>3</sub> is shown.

| Metric                                     | Episodic                      |                                           | Non-episodic                  |                                           |
|--------------------------------------------|-------------------------------|-------------------------------------------|-------------------------------|-------------------------------------------|
|                                            | EF (IF) and 95 % CI           | R <sup>2</sup> of the averaged linear fit | EF (IF) and 95 % CI           | R <sup>2</sup> of the averaged linear fit |
| PN > 5.4 nm (#/kg <sub>fuel</sub> )        | $(1.1 \pm 0.1) \cdot 10^{15}$ | 0.985                                     | $(2.3 \pm 0.2) \cdot 10^{15}$ | 0.991                                     |
| BC (g/kg <sub>fuel</sub> )                 | $0.068 \pm 0.007$             | 0.984                                     | $0.052 \pm 0.002$             | 0.998                                     |
| PM <sub>10</sub> (g/kg <sub>fuel</sub> )   | $0.51 \pm 0.10$               | 0.933                                     | $0.31 \pm 0.05$               | 0.954                                     |
| PM <sub>2.5</sub> (g/kg <sub>fuel</sub> )  | $0.36 \pm 0.06$               | 0.959                                     | $0.11 \pm 0.02$               | 0.937                                     |
| LDSA (m <sup>2</sup> /kg <sub>fuel</sub> ) | $1.12 \pm 0.08$               | 0.992                                     | $1.14 \pm 0.04$               | 0.998                                     |
| NO <sub>x</sub> (g/kg <sub>fuel</sub> )    | $4.04 \pm 0.54$               | 0.969                                     | $5.59 \pm 0.23$               | 0.997                                     |
| NO <sub>2</sub> (g/kg <sub>fuel</sub> )    | $1.87 \pm 0.18$               | 0.984                                     | $2.41 \pm 0.18$               | 0.990                                     |
| NO (g/kg <sub>fuel</sub> )                 | $1.22 \pm 0.36$               | 0.864                                     | $1.98 \pm 0.21$               | 0.981                                     |
| CO (g/kg <sub>fuel</sub> )                 | $7.89 \pm 0.76$               | 0.984                                     | $4.54 \pm 0.28$               | 0.993                                     |
| O <sub>3</sub> (g/kg <sub>fuel</sub> )     | $-2.81 \pm 0.33$              | 0.976                                     | $-2.17 \pm 0.20$              | 0.985                                     |

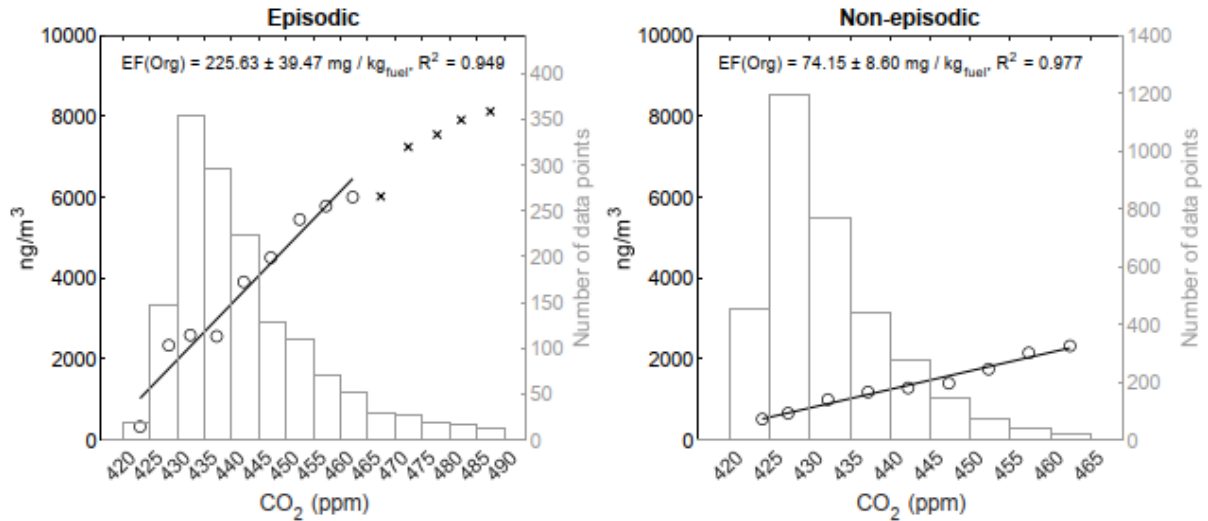

Figure S9. Episodic (left) and non-episodic (right) EFs of organics. Note the different x-axis.
